# Supplementary material for: Role of Lipopolysaccharide, Derived from Various Bacterial Species, in Pulpitis—A Systematic Review
Source: MDPI journal article supplement (doi:10.3390/biom12010138), 2022-01-15
Supplement: s1 [file s1]

## Systematic review protocol

### PICO

- Population – dental pulp cells (in vivo experiments excluded)
- Intervention – **LPS (Lipopolysaccharide)** stimulation cells in vitro
- Comparison – control group without LPS stimulation
- Outcome – any (i.e. changes in mRNA or protein expression, viability, mobility etc.)
- Study design – all except for reviews, letters and editorials, English language only

**Draft title:** Role of lipopolysaccharide, derived from various bacterial species, in pulpitis – a systematic review

### SUMMARY

**Context:** Data regarding the LPS stimulation on dental pulp cells has not been systematically reviewed and analyzed.

**Objective:** To gather all available evidence on the impact of LPS on dental pulp cells.

**Data sources:** English articles from MEDLINE, Web of Science and Scopus

**Study selection:** vide Study design in PICO

**Data extraction:** Data extraction from articles by MC, followed by a review by M. Kopka, using predefined data fields.

**Data synthesis:** non-applicable

**Conclusions:** Collected data give comprehensive summary on LPS effects on different cells present in pulp tissue.

### Search engines

#### Pubmed

((("Tooth pulp\*" [tw] OR "tooth pulp\*" OR "dental pulp\*") AND ("inflam\*" OR inflammation[mh])) OR pulpitis[mh] OR "pulpitis") AND (Lipopolysaccharides[mh] OR "LPS" OR "LPSs" OR "Lipopolysacchari\*" OR Bacterial Polysaccharides[mh])

#### Web of science

((("tooth pulp\*" OR "dental pulp\*") AND ("inflam\*")) OR "pulpitis") AND ("Lipopolysaccharides\*" OR "LPS" OR "LPSs" OR "Bacterial Polysaccharides\*")

#### Scopus

TITLE-ABS-KEY ( ( ( "tooth pulp\*" OR "dental pulp\*" ) AND ( "inflam\*" ) ) OR "pulpitis" ) AND ( "Lipopolysaccharides\*" OR "LPS" OR "LPSs" OR "Bacterial Polysaccharides\*" ) AND ( LIMIT-TO ( PUBSTAGE , "final" ) ) AND ( LIMIT-TO ( DOCTYPE , "ar" ) OR LIMIT-TO ( DOCTYPE , "re" ) ) AND ( LIMIT-TO ( LANGUAGE , "English" ) )

### Search strategy and verification

#### Step 1. Duplicates removal

#### Step 2. Screening by title:

- Is LPS used in the study?
- Are pulp cells used in the study?
- Is the subject of this study the use of LPS on pulp cells and investigation of effects?

If 3 x "yes" → Study included in step 3  
If at least 1 "no" → Study excluded  
If not certain → Abstract screening

**Step 3.**

- Verification of inclusion and exclusion criteria via full text screening

**Inclusion criteria:**

- Appropriate PICO
- Reported outcomes

**Exclusion criteria:**

- Inadequate PICO
- In vivo studies
